# Supplementary material for: Diversity and metagenome analysis of a hydrocarbon-degrading bacterial consortium from asphalt lakes located in Wietze, Germany
Source: bioRxiv or medRxiv preprint supplement (doi:10.1101/2021.03.25.436929), 2021-03-25
Supplement: Supplementary file [file media-1.pdf]

# Diversity and metagenome analysis of a hydrocarbon-degrading bacterial consortium from asphalt lakes located in Wietze, Germany

Michael O. Eze<sup>1,2\*</sup>, Grant C. Hose<sup>3</sup>, Simon C. George<sup>2</sup> and Rolf Daniel<sup>1</sup>

<sup>1</sup>Department of Genomic and Applied Microbiology and Göttingen Genomics Laboratory, Georg-August University of Göttingen, 37077 Göttingen, Germany.

<sup>2</sup>Department of Earth and Environmental Sciences, Macquarie University, Sydney, NSW 2109, Australia.

<sup>3</sup>Department of Biological Sciences, Macquarie University, Sydney, NSW 2109, Australia.

\*Correspondence: meze@gwdg.de

## Supplementary Materials

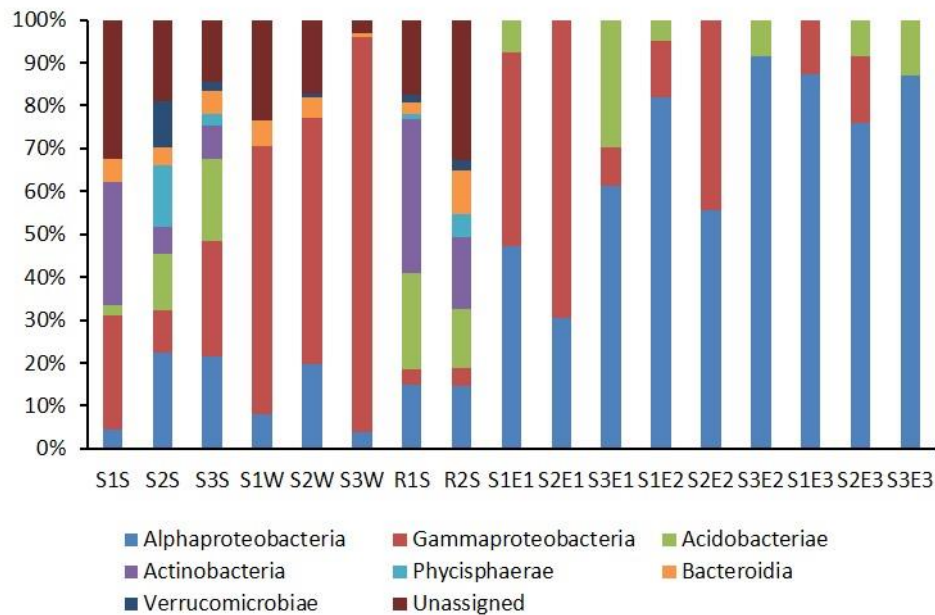

**Supplementary Figure S1.** Bacterial taxonomic distribution of all samples based on 16S rRNA gene amplicon data.

**Supplementary Table S2.** Richness, diversity and evenness obtained from the 16S rRNA sequencing of sampling sites and enrichment cultures

| Sample ID                  | Name | Richness | Chao1   | Chao1 (%) | Shannon Diversity | Pielou's Evenness |
|----------------------------|------|----------|---------|-----------|-------------------|-------------------|
| X20200114.BEWE.a.2136_S261 | S1S  | 381.99   | 475.51  | 80.33     | 4.140482857       | 0.696418531       |
| X20200114.BEWE.a.2137_S262 | S2S  | 958.43   | 1166.75 | 82.15     | 5.927652696       | 0.863422675       |
| X20200114.BEWE.a.2138_S263 | S3S  | 885.54   | 1076.78 | 82.24     | 5.625668073       | 0.828986773       |
| X20200114.BEWE.a.2139_S264 | S1W  | 731.44   | 971.95  | 75.25     | 4.491982504       | 0.68111784        |
| X20200114.BEWE.a.2140_S265 | S2W  | 666.94   | 848.21  | 78.63     | 3.840835511       | 0.590652415       |
| X20200114.BEWE.a.2141_S266 | S3W  | 389      | 581.5   | 66.9      | 2.409478261       | 0.40403223        |
| X20200114.BEWE.a.2142_S267 | R1S  | 629.32   | 806.44  | 78.04     | 4.89315041        | 0.759258936       |
| X20200114.BEWE.a.2143_S268 | R2S  | 1168.08  | 1274.35 | 91.66     | 6.322569919       | 0.89515298        |
| X20200114.BEWE.a.2144_S269 | S1E1 | 62.34    | 67.76   | 92        | 2.684138231       | 0.649503002       |
| X20200114.BEWE.a.2145_S270 | S2E1 | 44.91    | 50.35   | 89.2      | 2.228003222       | 0.585598434       |
| X20200114.BEWE.a.2146_S271 | S3E1 | 38.41    | 40.95   | 93.8      | 1.755745383       | 0.481247923       |
| X20200114.BEWE.a.2147_S272 | S1E2 | 45.09    | 56.52   | 79.78     | 1.896011697       | 0.497815886       |
| X20200114.BEWE.a.2148_S273 | S2E2 | 31.88    | 35.16   | 90.68     | 1.921605494       | 0.555059859       |
| X20200114.BEWE.a.2149_S274 | S3E2 | 14.05    | 14.66   | 95.82     | 0.829529079       | 0.313903749       |
| X20200114.BEWE.a.2150_S275 | S1E3 | 23.26    | 30.09   | 77.3      | 1.761694985       | 0.55984851        |
| X20200114.BEWE.a.2151_S276 | S2E3 | 27.44    | 40.95   | 67        | 1.257543211       | 0.379692792       |
| X20200114.BEWE.a.2152_S277 | S3E3 | 15.28    | 19.03   | 80.3      | 0.962736927       | 0.353097786       |

**Supplementary Table S2.** Metagenome-assembled genomes (MAGs) from both the soil and the enrichment metagenomes.

| User_genome           | Source metagenome  | classification                              | closest_placement_taxonomy     | closest_placement_ani | aa_percent |
|-----------------------|--------------------|---------------------------------------------|--------------------------------|-----------------------|------------|
| BEWE_m_45_metabat2.1  | Soil sample        | f__Acidobacteriaceae;g__Terracidiphilus;s__ | s__Terracidiphilus sp002314435 | 80.06                 | 73.89      |
| BEWE_m_45_metabat2.11 | Soil sample        | f__Mycobacteriaceae;g__Williamsia_A;s__     | s__Williamsia_A herbipolensis  | 80.27                 | 89.46      |
| BEWE_m_45_metabat2.15 | Soil sample        | f__Acetobacteraceae;g__Acidocella;s__       | N/A                            | N/A                   | 74.21      |
| BEWE_m_45_metabat2.18 | Soil sample        | f__Steroidobacteraceae;g__;s__              | N/A                            | N/A                   | 71.59      |
| BEWE_m_45_metabat2.19 | Soil sample        | f__Koribacteraceae;g__Koribacter;s__        | s__Koribacter sp003151155      | 89.00                 | 70.85      |
| BEWE_m_45_metabat2.21 | Soil sample        | f__Rhodanobacteraceae;g__Rudaea;s__         | s__Rudaea cellulositytica      | 78.03                 | 68.95      |
| BEWE_m_45_metabat2.22 | Soil sample        | f__UBA5335;g__UBA5335;s__                   | s__UBA5335 sp002862435         | 94.10                 | 61.21      |
| BEWE_m_45_metabat2.25 | Soil sample        | f__UBA5335;g__;s__                          | N/A                            | N/A                   | 94.40      |
| BEWE_m_45_metabat2.26 | Soil sample        | f__Nevskiaceae;g__Solimonas;s__             | N/A                            | N/A                   | 65.24      |
| BEWE_m_45_metabat2.27 | Soil sample        | f__Burkholderiaceae;g__BOG-994;s__          | N/A                            | N/A                   | 86.96      |
| BEWE_m_45_metabat2.28 | Soil sample        | f__UBA4822;g__UBA4822;s__                   | N/A                            | N/A                   | 73.71      |
| BEWE_m_45_metabat2.33 | Soil sample        | f__Actinomycetaceae;g__Pauljensenia;s__     | N/A                            | N/A                   | 81.75      |
| BEWE_m_45_metabat2.35 | Soil sample        | f__UBA5335;g__;s__                          | N/A                            | N/A                   | 87.62      |
| BEWE_m_45_metabat2.41 | Soil sample        | f__Acetobacteraceae;g__;s__                 | N/A                            | N/A                   | 66.59      |
| BEWE_m_45_metabat2.6  | Soil sample        | f__Burkholderiaceae;g__Caballeronia;s__     | N/A                            | N/A                   | 93.91      |
| BEWE_m_46_metabat2.2  | Enrichment culture | f__Acetobacteraceae;g__Acidocella;s__       | s__Acidocella aminolytica      | 82.29                 | 82.02      |
| BEWE_m_46_metabat2.4  | Enrichment culture | f__Acidobacteriaceae;g__Acidobacterium;s__  | s__Acidobacterium capsulatum   | 85.13                 | 97.02      |
| BEWE_m_46_metabat2.5  | Enrichment culture | f__Acetobacteraceae;g__Acidocella;s__       | N/A                            | N/A                   | 96.83      |

**Supplementary Table S3.** Quality check for the MAGs

| Bin.Id                | Marker.lineage                   | X..genomes | X..markers | X..marker.sets | X0  | X1  | X2 | X3 | X4 | X5. | Completeness | Contamination | Strain. Heterogeneity |
|-----------------------|----------------------------------|------------|------------|----------------|-----|-----|----|----|----|-----|--------------|---------------|-----------------------|
| BEWE_m_45_metabat2.1  | k__Bacteria (UID3187)            | 2258       | 187        | 116            | 54  | 125 | 8  | 0  | 0  | 0   | 82.75        | 6.47          | 12.5                  |
| BEWE_m_45_metabat2.11 | o__Actinomycetales (UID1814)     | 148        | 572        | 276            | 25  | 547 | 0  | 0  | 0  | 0   | 97.53        | 0             | 0                     |
| BEWE_m_45_metabat2.15 | o__Rhodospirillales (UID3754)    | 63         | 336        | 201            | 48  | 284 | 4  | 0  | 0  | 0   | 93.75        | 1.49          | 25                    |
| BEWE_m_45_metabat2.18 | c__Gammaproteobacteria (UID4202) | 67         | 481        | 276            | 110 | 329 | 41 | 0  | 1  | 0   | 77.26        | 8.06          | 0                     |
| BEWE_m_45_metabat2.19 | k__Bacteria (UID3187)            | 2258       | 188        | 117            | 55  | 132 | 1  | 0  | 0  | 0   | 87.39        | 0.85          | 0                     |
| BEWE_m_45_metabat2.21 | f__Xanthomonadaceae (UID4214)    | 55         | 659        | 290            | 103 | 536 | 20 | 0  | 0  | 0   | 91.72        | 3.88          | 30                    |
| BEWE_m_45_metabat2.22 | c__Gammaproteobacteria (UID4201) | 1164       | 275        | 174            | 93  | 179 | 3  | 0  | 0  | 0   | 64.27        | 1.72          | 66.67                 |
| BEWE_m_45_metabat2.25 | c__Gammaproteobacteria (UID4267) | 119        | 544        | 284            | 28  | 513 | 3  | 0  | 0  | 0   | 94.55        | 0.82          | 0                     |
| BEWE_m_45_metabat2.26 | k__Bacteria (UID203)             | 5449       | 104        | 58             | 48  | 52  | 4  | 0  | 0  | 0   | 66.07        | 6.03          | 50                    |
| BEWE_m_45_metabat2.27 | c__Betaproteobacteria (UID3888)  | 323        | 387        | 234            | 41  | 340 | 5  | 1  | 0  | 0   | 89.01        | 0.88          | 25                    |
| BEWE_m_45_metabat2.28 | k__Bacteria (UID203)             | 5449       | 102        | 56             | 13  | 89  | 0  | 0  | 0  | 0   | 80.36        | 0             | 0                     |
| BEWE_m_45_metabat2.33 | f__Actinomycetaceae (UID1531)    | 42         | 420        | 211            | 58  | 358 | 2  | 2  | 0  | 0   | 87.1         | 2.37          | 25                    |
| BEWE_m_45_metabat2.35 | c__Gammaproteobacteria (UID4267) | 119        | 544        | 284            | 44  | 493 | 7  | 0  | 0  | 0   | 90.77        | 1.88          | 14.29                 |
| BEWE_m_45_metabat2.41 | o__Rhodospirillales (UID3754)    | 63         | 336        | 201            | 114 | 219 | 3  | 0  | 0  | 0   | 65.49        | 0.76          | 66.67                 |
| BEWE_m_45_metabat2.6  | g__Burkholderia (UID4006)        | 64         | 769        | 248            | 51  | 692 | 26 | 0  | 0  | 0   | 94.03        | 1.51          | 38.46                 |
| BEWE_m_46_metabat2.2  | o__Rhodospirillales (UID3754)    | 63         | 336        | 201            | 80  | 256 | 0  | 0  | 0  | 0   | 72.39        | 0             | 0                     |
| BEWE_m_46_metabat2.4  | k__Bacteria (UID3187)            | 2258       | 188        | 117            | 1   | 186 | 1  | 0  | 0  | 0   | 99.79        | 0.85          | 0                     |
| BEWE_m_46_metabat2.5  | o__Rhodospirillales (UID3754)    | 63         | 336        | 201            | 0   | 335 | 1  | 0  | 0  | 0   | 100          | 0.08          | 0                     |
